# Supplementary material for: Interfacial synergy between biogenic silica and reduced graphene oxide: Experimental and theoretical insights into cationic pollutants adsorption
Source: Royal Society of Chemistry journal article supplement (doi:10.1039/d5lf00350d), 2026-01-01
Supplement: d5lf00350d1.pdf [file d5lf00350d1.pdf]

## Supplementary Information

### Interfacial synergy between biogenic silica and reduced graphene oxide: Experimental and theoretical insights into cationic pollutants adsorption

Mayara Bitencourt Leão<sup>a</sup>, Mônica Carla Lopes<sup>b</sup>, Laura F. O. Vendrame<sup>c</sup>, Leonardo Costa Dias<sup>a</sup>, Ivana Zanella<sup>c</sup>, Solange B. Fagan,<sup>c</sup> Robert Burrow<sup>b</sup>, Iuri Medeiros Jauris<sup>d</sup>, Carolina Ferreira de Matos Jauris<sup>b\*</sup>

<sup>a</sup>Environmental Science and Technology Center, Campus Caçapava do Sul, Federal University of Pampa, Caçapava do Sul, Brazil,

<sup>b</sup>Chemistry Department, Federal University of Santa Maria, Santa Maria, Brazil,

<sup>c</sup>Physics Department, Franciscan University, Santa Maria, Brazil,

<sup>d</sup>School of Sciences, Pontifical Catholic University of Rio Grande do Sul, Porto Alegre, Brazil

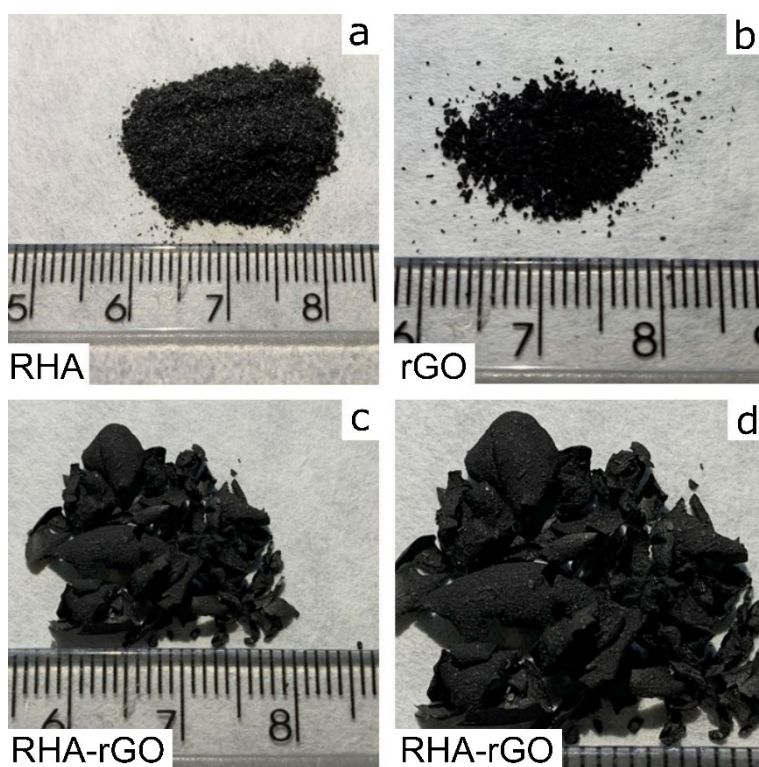

**Figure S1.** Digital photographs of the materials after drying: (a) rice husk ash (RHA), (b) reduced graphene oxide (rGO), and (c,d) RHA-rGO nanocomposite. The images illustrate the macroscopic appearance of the samples, highlighting the fine, powder-like morphologies of RHA and rGO, and the formation of larger, compact agglomerates in the hybrid material.

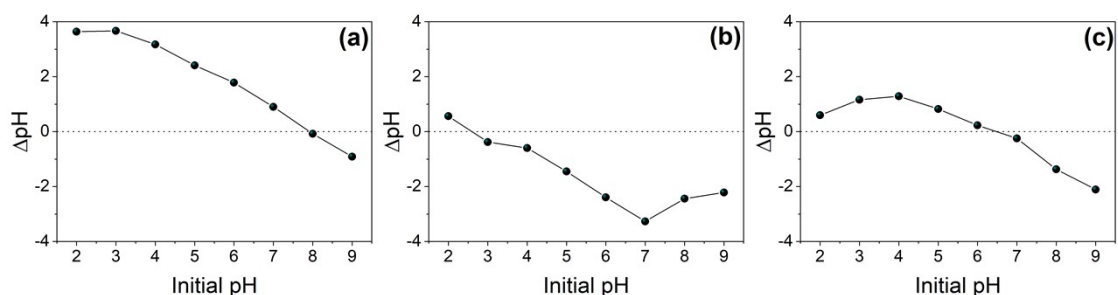

**Figure S2.** Point of zero charge for (a) rice husk ash, (b) reduced graphene oxide, and (c) nanocomposite of rice husk ash and reduced graphene oxide.

**Table S1.** FTIR band assignments and mechanistic relevance for GO, rGO, RHA, and RHA-rGO before and after Safranin O adsorption. The table lists key wavenumber ranges ( $\text{cm}^{-1}$ ), band assignments, the main samples where they are observed, and the spectral changes upon dye uptake, highlighting Si–O–C interfacial coupling,  $\pi$ -active domains, and hydrogen-bond/electrostatic contributions to the proposed mechanism.

| Band ( $\text{cm}^{-1}$ ) | Assignment                                                       |
|---------------------------|------------------------------------------------------------------|
| ~3400                     | O-H $\nu_s$ (of surface -OH / physisorbed $\text{H}_2\text{O}$ ) |
| ~1720                     | C=O $\nu_s$ (carboxyl/ketone from oxidation)                     |
| ~1630                     | H-O-H bending (adsorbed water)<br>aromatic C=C contribution      |
| 1610 to 1500              | Aromatic C=C / C=N (Safranin O phenazinium ring)                 |
| 1250 to 1050              | C-O-C / C–O stretching (epoxide/hydroxyl)                        |
| 1080 to 1030              | Si-O-Si $\nu_{as}$ (silica network)                              |
| ~ 800                     | Si-O-Si $\nu_s$                                                  |
| ~ 470                     | Si–O bending                                                     |
| 1100–1000                 | Si–O–C interfacial linkage (silica–carbon coupling)              |

**Table S2.** Raman parameters for GO, rGO, RHA, and RHA-rGO samples, including D and G band positions,  $I_D/I_G$  ratios, and the calculated in-plane crystallite ( $L_a$ ) and defect ( $L_D$ ) domain sizes, used to assess structural order and defect density after reduction and hybridization.

| Amostra | D band ( $\text{cm}^{-1}$ ) | G band ( $\text{cm}^{-1}$ ) | $I_D/I_G$ | $L_a$ (nm) | $L_D$ (nm) |
|---------|-----------------------------|-----------------------------|-----------|------------|------------|
| RHA     | 1336                        | 1599                        | 1.263     | 15.2       | 179.5      |
| RHA-rGO | 1332                        | 1569                        | 1.550     | 12.4       | 163.4      |
| rGO     | 1339                        | 1567                        | 1.403     | 13.7       | 170.4      |
| GO      | 1341                        | 1580                        | 0.995     | 19.3       | 203.8      |

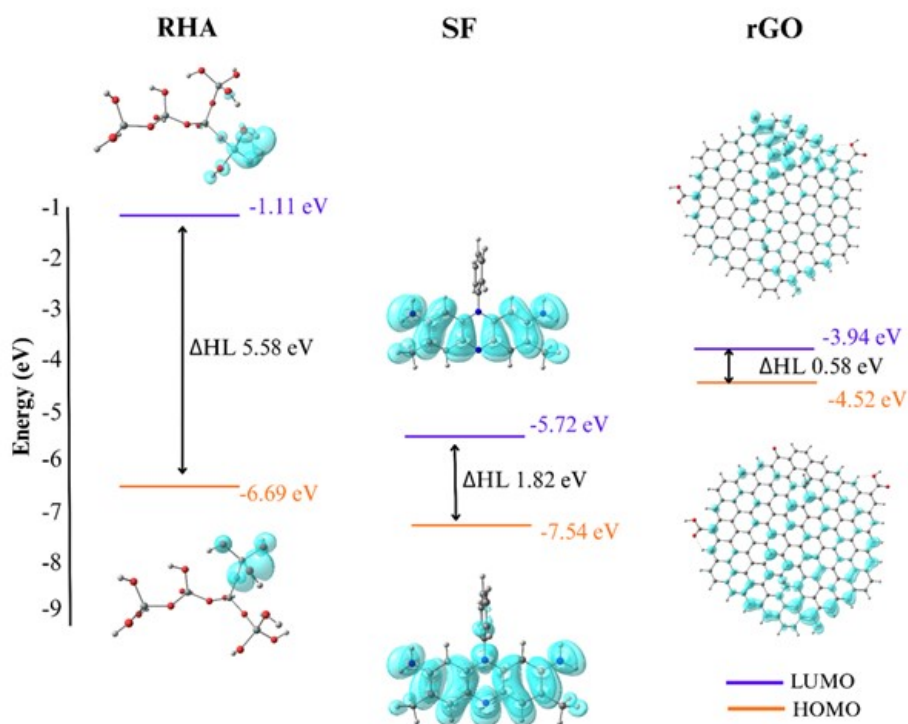

**Figure S3:** Schematic representation of Frontier Molecular Orbital energy diagram of RHA, SF and rGO. Orbital charge density isosurface value of  $0.0006 \text{ e}^- \text{ \AA}^{-3}$ .

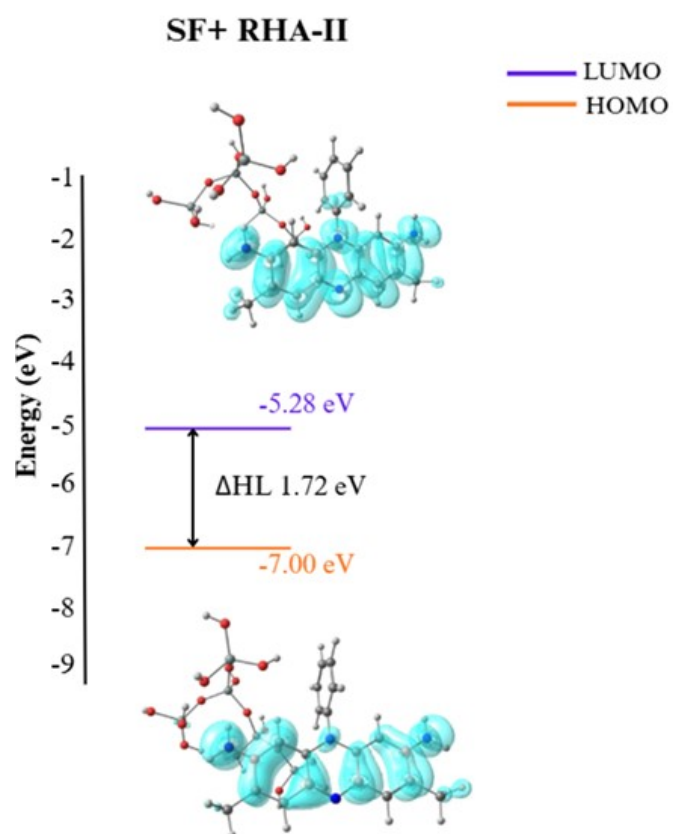

**Figure S4.** Energy diagram of SF+RHA-II, the most stable configuration among all those studied for SF+RHA. Orbital charge density isosurface value of  $0.0006 \text{ e}^- \text{ \AA}^{-3}$ .

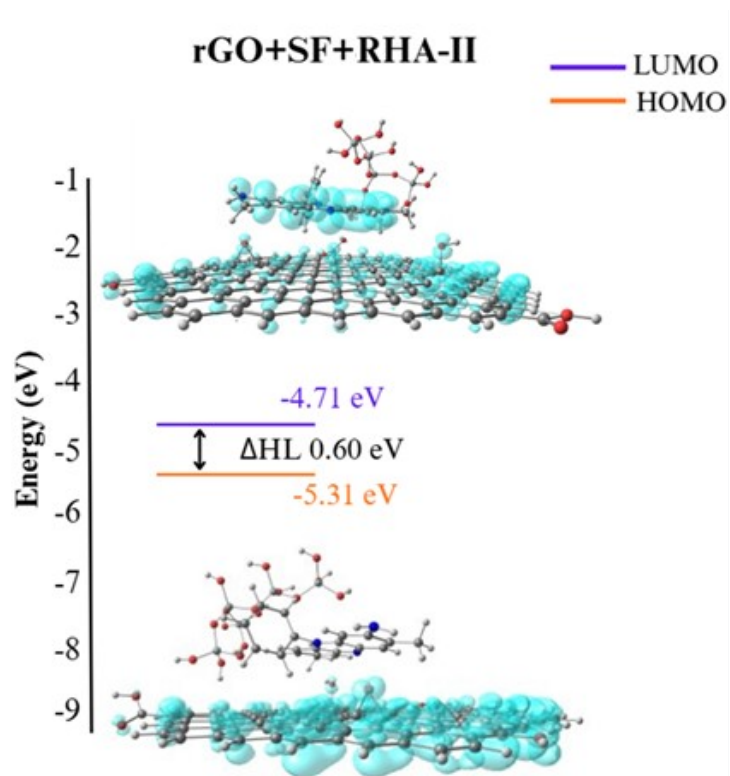

**Figure S5** - Energy diagram of rGO+SF+RHA-II, the most stable configuration among all those studied for of rGO+SF+RHA. Orbital charge density isosurface value of  $0.0006 \text{ e}^- \text{ \AA}^{-3}$ .
